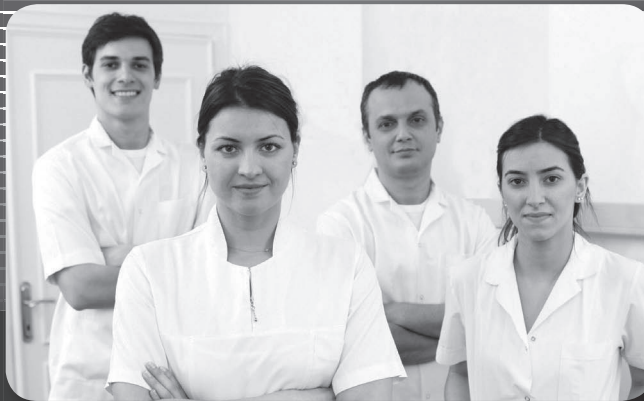

## Attention Psychiatric Residents!

Are you connected to **PsychiatryOnline.org** –  
THE most comprehensive online collection of psychiatric books and journals?

Over 50% of US medical schools subscribe to **DSM Premium @ PsychiatryOnline**.  
Don't be one of the ones who don't have access to this essential resource.

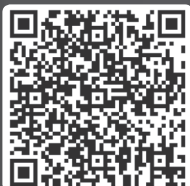

**Get plugged into PsychiatryOnline.org today!**

A definite ***must have*** for every psychiatric resident.

Use your phone to scan the QR code for more information and see if your medical school subscribes to **PsychiatryOnline.org**.

## Professionalism in Psychiatry

Glen O. Gabbard, M.D., Laura Weiss Roberts, M.D., M.A.,  
Holly Crisp-Han, M.D., Valdesha Ball, M.D.,  
Gabrielle Hobday, M.D., and Funmilayo Rachal, M.D.

In *Professionalism in Psychiatry*, the authors seek to define the factors that influence professionalism and address principles that are now part of the core curriculum for medical students, psychiatry students, educators, and practicing clinicians. This book is a must read for any educator or professional wanting to better understand the relationship between professionalism, ethics, and the avoidance of boundary violations.

2012 • 240 pages • ISBN 978-1-58562-337-2 • Paperback  
\$60.00 • Item #62337

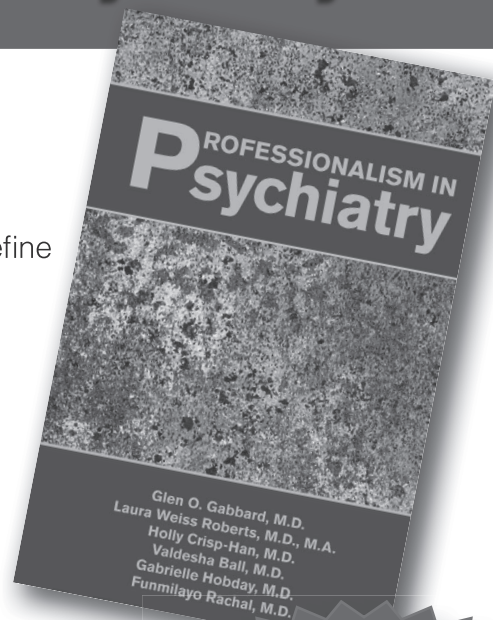

American  
**Psychiatric**  
Publishing

A Division of American Psychiatric Association

**www.appi.org** • 1-800-368-5777  
Fax: 703-907-1091 • Email: [appi@psych.org](mailto:appi@psych.org)

Find us on and

20% Discount for American  
Psychiatric Association Members!

25% Discount for APA  
Members-in-Training!

AH1147A
