# New and Essential Titles on Mood Disorders

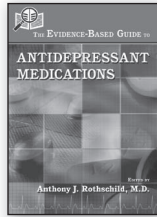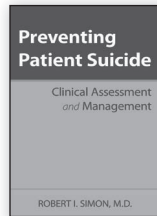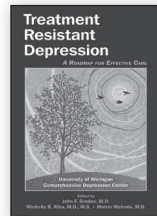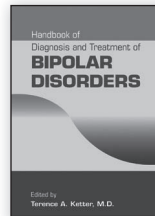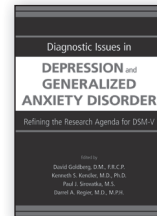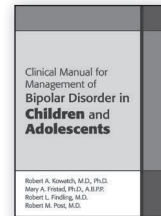

## The Evidence-Based Guide to Antidepressant Medications

Edited by Anthony J. Rothschild, M.D.

Due December 2011!

This book provides a clear reference to the current knowledge and evidence base for the use of antidepressants among a variety of patients across a wide range of disorders. Chapters within this guide are authored by experts in their respective areas of practice, and synthesize a large amount of medical literature into a comprehensive, yet understandable, concise, reader-friendly guide. Each chapter covers both the FDA-approved and off-label use of antidepressant medications and the evidence base for their use. Each chapter also features useful tables pertaining to specific topics, such as summaries of uses and efficacy, and important clinical pearls of wisdom in the Key Clinical Concepts.

2012 • 480 pages • ISBN 978-1-58562-405-8 • Paperback • \$69.00 • Item #62405

## Preventing Patient Suicide Clinical Assessment and Management

Robert I. Simon, M.D.

NEW!

*Preventing Patient Suicide: Clinical Assessment and Management* provides the wisdom of Dr. Robert I. Simon's vast clinical experience, combined with the latest insights from the evidence-based psychiatric literature, to offer a cutting-edge survey of suicide prevention and management techniques.

2011 • 235 pages • ISBN 978-1-58562-934-3 • Paperback • \$55.00 • Item #62934

## Clinical Manual for Management of Bipolar Disorder in Children and Adolescents

Robert A. Kowatch, M.D., Mary A. Fristad, Ph.D., ABPP,  
Robert L. Findling, M.D., and Robert M. Post, M.D.

Written to provide clinically useful information about diagnosis and management, this manual is a comprehensive collection of empirical evidence, case studies, and the growing number of evidence-based reports on pediatric bipolar disorder over the past five years.

2009 • 355 pages • ISBN 978-1-58562-291-7 • Paperback • \$69.00 • Item #62291

## Treatment Resistant Depression A Roadmap for Effective Care

NEW!

Edited by John F. Greden, M.D., Michelle B. Riba, M.D., M.S., and Melvin G. McInnis, M.D.

University of Michigan Comprehensive Depression Center

This unique book presents the treatment "roadmap" implemented by the University of Michigan Comprehensive Depression Center's Treatment Resistant Depression Program, step-by-step guidance that has long eluded clinicians, patients, and their families.

2011 • 364 pages • ISBN 978-1-58562-409-6 • Paperback • \$69.00 • Item #62409

## Handbook of Diagnosis and Treatment of Bipolar Disorders

Edited by Terence A. Ketter, M.D.

This readable guide to the assessment and management of patients with bipolar disorder can help physicians keep abreast of dramatic and rapid advances of recent years and integrate them into their practice. This book emphasizes recent controlled studies and FDA-approved indications and translates these data into the real world of clinical practice.

2010 • 768 pages • ISBN 978-1-58562-313-6 • Paperback • \$72.00 • Item #62313

## Diagnostic Issues in Depression and Generalized Anxiety Disorder

Refining the Research Agenda for DSM-V

Edited by David Goldberg, D.M., F.R.C.P., Kenneth S. Kendler, M.D., Paul J. Sirovatka, M.S., and Darrel A. Regier, M.D., M.P.H.

*Diagnostic Issues in Depression and Generalized Anxiety Disorder: Refining the Research Agenda for DSM-V* explores the nosologic relationship between GAD and MD. In this comprehensive manual, more than 45 contributors cover a wide range of empirical and conceptual issues that face clinicians and researchers working with GAD and MD today.

2010 • 400 pages • ISBN 978-0-89042-456-8 • Paperback • \$70.00 • Item #2456

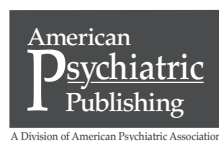

The First and Last Word in Psychiatry

[www.appi.org](http://www.appi.org)

Email: [appi@psych.org](mailto:appi@psych.org)

Phone: 1-800-368-5777

Priority Code AH1155
