# FOCUS

THE JOURNAL OF LIFELONG LEARNING IN PSYCHIATRY



## *Bipolar Disorder*

*Guest Editor, Trisha Suppes, M.D., Ph.D.*

### IN CLINICAL SYNTHESIS:

What's Up with Bipolar Disorder?

*Trisha Suppes, M.D., Ph.D.*

Decoding the Biology of Bipolar Disorder

*Huaiyu Yang, M.D., M.P.A.*

Bipolar and Substance Use Disorder Comorbidity

*Michael J. Ostacher, M.D., MPH, MMSc*

Bipolar Disorder with Co-Occurring Eating Disorders:  
Prevalence and Pharmacotherapeutic Implications

*Susan L. McElroy, M.D.*

*Anna Guerdjikova, Ph.D.*

*Sarah Lavanier, Psy.D.*

*Anne O'Melia, M.D.*

AND INFLUENTIAL PUBLICATIONS . . .
